# Supplementary material for: The closed spiracle phase of discontinuous gas exchange predicts diving duration in the grasshopper, Paracinema tricolor
Source: Oxford University Press journal article supplement (doi:10.1242/jeb.135129), 2016-01-01
Supplement: jeb135129supp.pdf [file jeb135129supp.pdf]

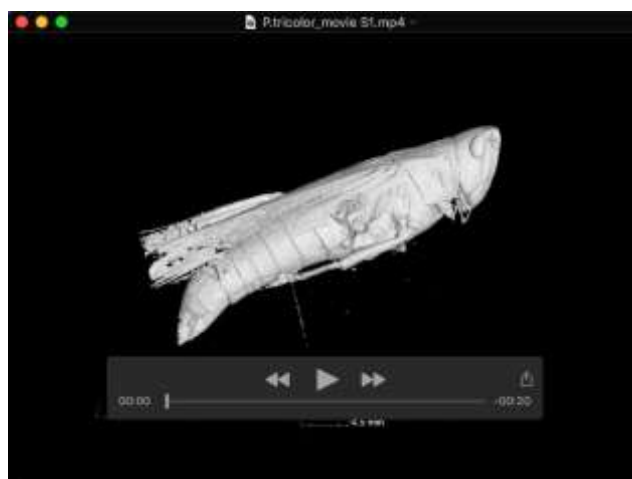

Movie S1. CT scan of respiratory system in *P. tricolor*.

Table S1. Correlation matrix (*r*-values) between all estimated physiology, morphology and behaviour parameters (*p*<0.05 in bold, *n*=9 except tracheal volume *n*=4).

|                                        | log <sub>10</sub> mass | log <sub>10</sub> MR | log <sub>10</sub> mean C-phase length | log <sub>10</sub> mean O-phase length | log <sub>10</sub> mean diving duration | log <sub>10</sub> tracheal volume |
|----------------------------------------|------------------------|----------------------|---------------------------------------|---------------------------------------|----------------------------------------|-----------------------------------|
| log <sub>10</sub> mass                 | 1.00                   |                      |                                       |                                       |                                        |                                   |
| log <sub>10</sub> MR                   | <b>0.92</b>            | 1.00                 |                                       |                                       |                                        |                                   |
| log <sub>10</sub> mean C-phase length  | <b>0.71</b>            | <b>0.77</b>          | 1.00                                  |                                       |                                        |                                   |
| log <sub>10</sub> mean O-phase length  | 0.33                   | 0.55                 | 0.48                                  | 1.00                                  |                                        |                                   |
| log <sub>10</sub> mean diving duration | <b>0.89</b>            | <b>0.90</b>          | <b>0.89</b>                           | 0.50                                  | 1.00                                   |                                   |
| log <sub>10</sub> tracheal volume      | <b>0.97</b>            | <b>0.99</b>          | 0.67                                  | 0.59                                  | 0.89                                   | 1.00                              |

**Table S2. Comparison between tracheal volume (cm<sup>3</sup>) as an internal oxygen stores, oxygen consumption rates (mL h<sup>-1</sup>) calculated using an RQ=0.85 and maximal diving time (min) and C-phase length (min); assuming 21% O<sub>2</sub> in tracheal gas.**

| ID | sex | tracheal volume (cm <sup>3</sup> ) | O <sub>2</sub> consumption rates (mL h <sup>-1</sup> ) | maximal diving time (min) | maximal C-phase length (min) | potential maximal time without open spiracles (min) |
|----|-----|------------------------------------|--------------------------------------------------------|---------------------------|------------------------------|-----------------------------------------------------|
| 5  | M   | 0.097                              | 0.049                                                  | 4.21                      | 7.4                          | 24.9                                                |
| 14 | M   | 0.155                              | 0.089                                                  | 11.19                     | 14.5                         | 21.9                                                |
| 11 | F   | 0.470                              | 0.308                                                  | 31.47                     | 31.7                         | 19.2                                                |
| 12 | F   | 0.382                              | 0.213                                                  | 7.34                      | 9.5                          | 22.6                                                |

Table S3. Comparison between tracheal volume for *P.tricolor* and other grasshopper species reported in Huang et al. (2015) (after body mass correction).

| species                 | tracheal volume (mm <sup>3</sup> g <sup>-1</sup> ) |
|-------------------------|----------------------------------------------------|
| <i>P. tricolor</i> (F)  | 513.25                                             |
| <i>P. tricolor</i> (M)  | 484.62                                             |
| <i>T. pulchripennis</i> | 350.98                                             |
| <i>O. bethlemita</i>    | 241.67                                             |
| <i>O. lividipes</i>     | 275.51                                             |
